# Supplementary material for: Influence of Proteolysis on the Binding Capacity of Flavor Compounds to Myofibrillar Proteins
Source: MDPI journal article supplement (doi:10.3390/foods11060891), 2022-03-21
Supplement: s1 [file s1]

**Table S1.** The  $K_{sv}$  and  $K_q$  values of flavor compounds in myofibrillar protein treated by enzymes at different time points

| Enzyme | Flavor compounds | Time (min)  | $K_{sv}$ (L <sup>-1</sup> mol) | $K_q$ (10 <sup>8</sup> Lmol <sup>-1</sup> s <sup>-1</sup> ) | R <sup>2</sup> |
|--------|------------------|-------------|--------------------------------|-------------------------------------------------------------|----------------|
| Papain | Butyraldehyde    | Control (0) | 14.30±1.36                     | 14.30±1.36                                                  | 0.9997         |
|        |                  | 5           | 10.72±1.47                     | 10.72±1.47                                                  | 0.9999         |
|        |                  | 15          | 23.52±0.73                     | 23.52±0.73                                                  | 0.9988         |
|        |                  | 30          | 14.71±1.68                     | 14.71±1.68                                                  | 0.9973         |
|        |                  | 50          | 9.67±1.25                      | 9.67±1.25                                                   | 0.9999         |
|        | Octanal          | Control (0) | 179.53±4.45                    | 179.53±4.45                                                 | 0.9850         |
|        |                  | 5           | 203.78±1.29                    | 203.78±1.29                                                 | 0.9886         |
|        |                  | 15          | 240.75±3.64                    | 240.75±3.64                                                 | 0.9850         |
|        |                  | 30          | 182.19±2.70                    | 182.19±2.70                                                 | 0.9790         |
|        |                  | 50          | 191.88±1.94                    | 191.88±1.94                                                 | 0.9805         |
|        | 2-Pentanone      | Control (0) | 22.57±2.37                     | 22.57±2.37                                                  | 0.9850         |
|        |                  | 5           | 30.20±1.21                     | 30.20±1.21                                                  | 0.9997         |
|        |                  | 15          | 28.28±1.54                     | 28.28±1.54                                                  | 0.9995         |
|        |                  | 30          | 30.42±0.27                     | 30.42±0.27                                                  | 0.9999         |
|        |                  | 50          | 24.58±1.39                     | 24.58±1.39                                                  | 0.9997         |
|        | 2-Octanone       | Control (0) | 25.17±0.65                     | 25.17±0.65                                                  | 0.9998         |
|        |                  | 5           | 48.36±1.58                     | 48.36±1.58                                                  | 0.9997         |
|        |                  | 15          | 52.22±2.17                     | 52.22±2.17                                                  | 0.9998         |
|        |                  | 30          | 48.94±1.14                     | 48.94±1.14                                                  | 0.9983         |

|              |               |             |             |             |        |
|--------------|---------------|-------------|-------------|-------------|--------|
| Bromelain    | Butyraldehyde | 50          | 44.55±1.78  | 44.55±1.78  | 0.9981 |
|              |               | Control (0) | 14.30±1.36  | 14.30±1.36  | 0.9997 |
|              |               | 5           | 9.55±0.60   | 9.55±0.60   | 0.9999 |
|              |               | 15          | 11.56±0.58  | 11.56±0.58  | 0.9999 |
|              |               | 30          | 4.79±2.88   | 4.79±2.88   | 0.9995 |
|              | Octanal       | 50          | 15.66±0.74  | 15.66±0.74  | 0.9996 |
|              |               | Control (0) | 179.53±4.45 | 179.53±4.45 | 0.9850 |
|              |               | 5           | 163.73±5.53 | 163.73±5.53 | 0.9874 |
|              |               | 15          | 157.04±2.66 | 157.04±2.66 | 0.9781 |
|              |               | 30          | 201.90±1.71 | 201.90±1.71 | 0.9812 |
|              | 2-Pentanone   | 50          | 225.77±2.79 | 225.77±2.79 | 0.9778 |
|              |               | Control (0) | 22.57±2.37  | 22.57±2.37  | 0.9850 |
|              |               | 5           | 26.09±0.90  | 26.09±0.90  | 0.9998 |
|              |               | 15          | 22.33±1.79  | 22.33±1.79  | 0.9997 |
|              |               | 30          | 13.24±1.86  | 13.24±1.86  | 0.9999 |
| Proteinase K | 2-Octanone    | 50          | 20.38±1.95  | 20.38±1.95  | 0.9997 |
|              |               | Control (0) | 25.17±0.65  | 25.17±0.65  | 0.9998 |
|              |               | 5           | 44.14±1.76  | 44.14±1.76  | 0.9997 |
|              |               | 15          | 39.30±2.21  | 39.30±2.21  | 0.9991 |
|              |               | 30          | 58.60±1.92  | 58.60±1.92  | 0.9993 |
|              | Butyraldehyde | 50          | 27.88±1.70  | 27.88±1.70  | 0.9992 |
|              |               | Control (0) | 14.30±1.36  | 14.30±1.36  | 0.9997 |
|              |               | 5           | 13.47±0.44  | 13.47±0.44  | 0.9996 |
|              |               | 15          | 13.18±0.81  | 13.18±0.81  | 0.9999 |
|              |               | 30          | 15.07±1.90  | 15.07±1.90  | 0.9997 |

|             |             |              |              |        |
|-------------|-------------|--------------|--------------|--------|
|             | 50          | 6.70±0.98    | 6.70±0.98    | 0.9999 |
|             | Control (0) | 179.53±4.45  | 179.53±4.45  | 0.9850 |
|             | 5           | 152.75±12.90 | 152.75±12.90 | 0.9850 |
| Octanal     | 15          | 147.43±4.76  | 147.43±4.76  | 0.9833 |
|             | 30          | 138.38±1.34  | 138.38±1.34  | 0.9896 |
|             | 50          | 151.94±5.71  | 151.94±5.71  | 0.9873 |
|             | Control (0) | 22.57±2.37   | 22.57±2.37   | 0.9850 |
|             | 5           | 26.87±1.72   | 26.87±1.72   | 0.9999 |
| 2-Pentanone | 15          | 25.99±0.30   | 25.99±0.30   | 0.9998 |
|             | 30          | 25.56±0.77   | 25.56±0.77   | 0.9998 |
|             | 50          | 22.96±0.78   | 22.96±0.78   | 0.9999 |
|             | Control (0) | 25.17±0.65   | 25.17±0.65   | 0.9998 |
|             | 5           | 44.12±1.37   | 44.12±1.37   | 0.9995 |
| 2-Octanone  | 15          | 31.44±3.24   | 31.44±3.24   | 0.9999 |
|             | 30          | 35.38±1.86   | 35.38±1.86   | 0.9985 |
|             | 50          | 36.02±0.83   | 36.02±0.83   | 0.9997 |

---
